# Supplementary material for: Characterization of spray-dried Gac aril extract and estimated shelf life of β-carotene and lycopene
Source: PeerJ journal article supplement (doi:10.7717/peerj.11134), 2021-03-24
Supplement: Supplemental_FiIe_2_Supplementary_data_chromatogram_of__beta_carotene_and_lycopene.pdf [file Supplemental_FiIe_2_Supplementary_data_chromatogram_of__beta_carotene_and_lycopene.pdf]

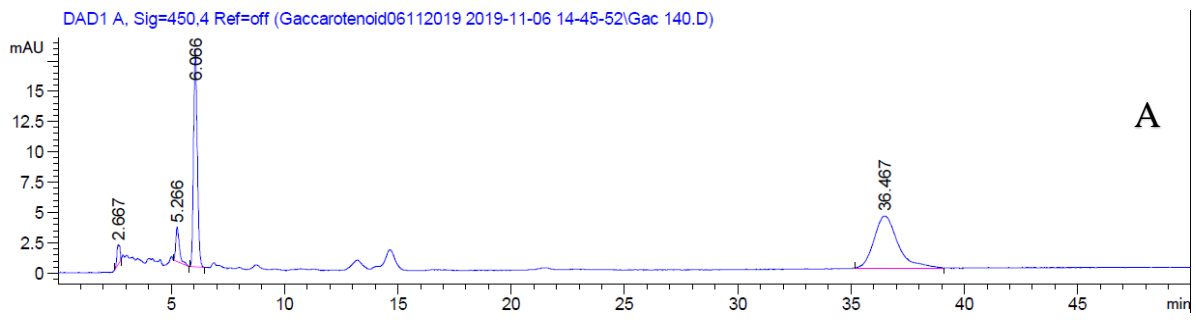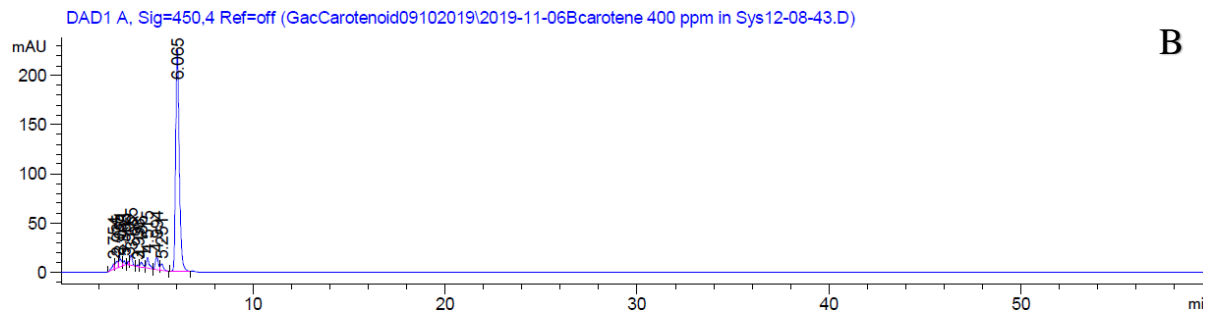

$\beta$ -carotene (A) and lycopene (B) standard at 450 nm.

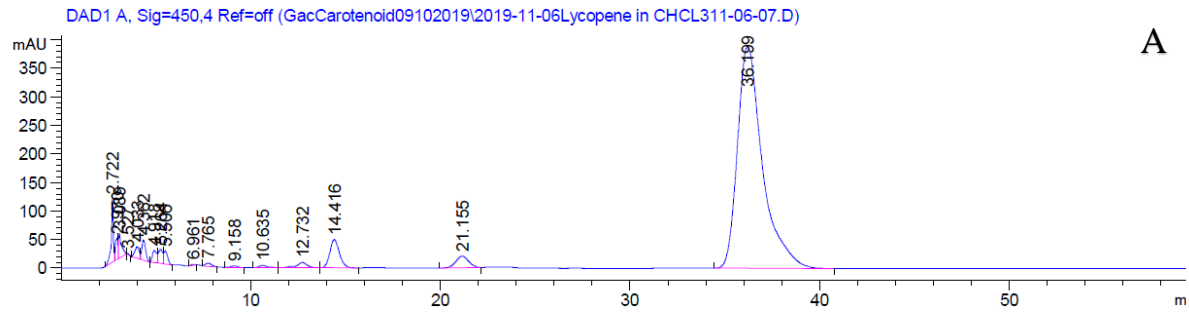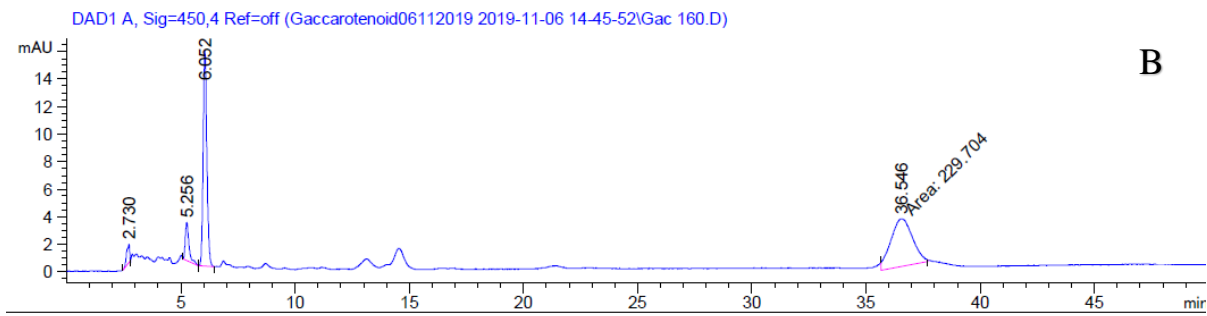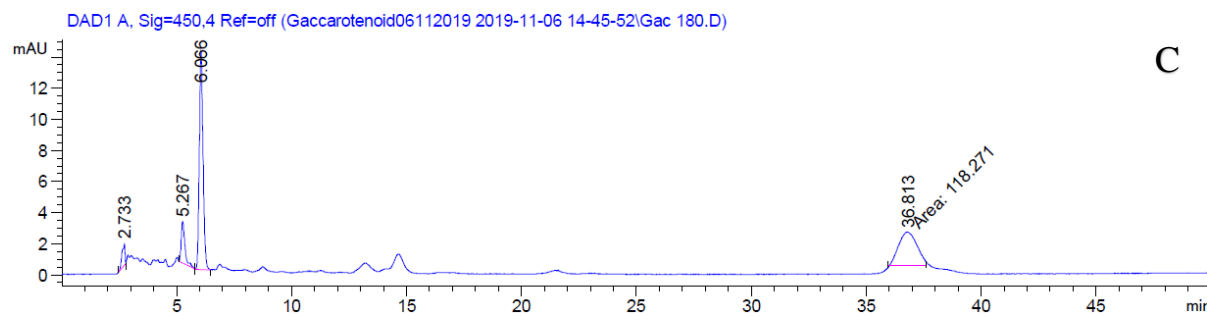

$\beta$ -carotene (A) and lycopene (B) of Gac aril powders dried at 140°C (A), 160°C (B), 180°C (C) determine at 450 nm
